# Supplementary material for: A global assessment of endemism and species richness across island and mainland regions
Source: HighWire-hosted journal article supplement (doi:10.1073/pnas.0810306106), 2009-05-21
Supplement: 0810306106SI.pdf [file 0810306106SI.pdf]

# Supporting Information

Kier et al. 10.1073/pnas.0810306106

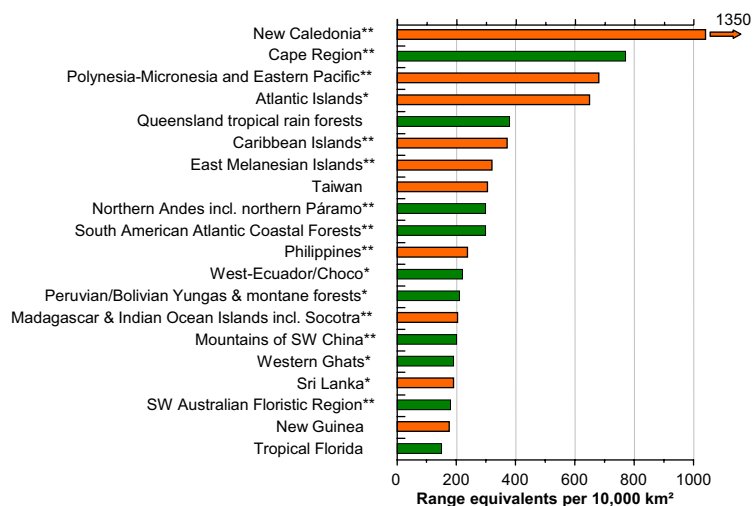

**Fig. S1.** Top 20 regions according to the level of endemism richness of vascular plants. Asterisks indicate congruence (\*\*) or large overlap (\*) with the biodiversity hotspots by Conservation International (Mittermeier, et al. 2004). Orange bars indicate island regions, green bars mainland regions.





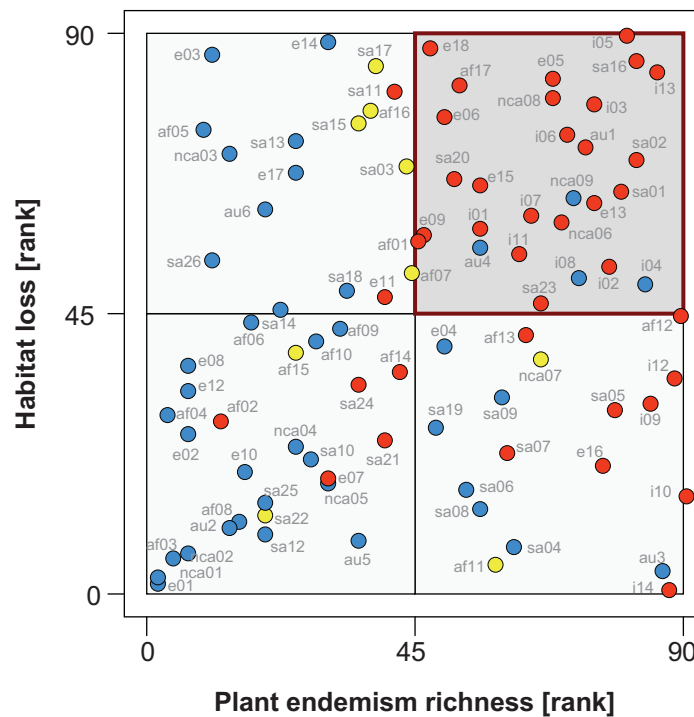

**Fig. S4.** Rank-based values of past habitat loss plotted against plant endemism richness per standard area. Colored dots indicate congruence with biodiversity hotspots (sensu Mittermeier, et al. 2004): red color, identical or almost identical (overlap >75%), yellow, significant overlap (10–75%), blue, no or minor overlap (0–10%). Labels indicate unique identifiers for each region (compare Table S1). Among the regions that are in the top half with regard to both habitat loss and endemism richness per standard area (*Upper Right* sector of the figure), only 4 are not part of a hotspot: New Guinea, Taiwan, the Eastern and Southeastern Australian temperate forests, and tropical Florida. All of these discrepancies can be explained. On New Guinea and Taiwan and in Eastern and Southeastern Australia, habitat loss is only little above the median, and it is very low in the Queensland tropical rain forests. Tropical Florida was formerly part of the “Caribbean hotspot” (Myers, et al. 2000) but later explicitly excluded for phylogeographic reasons and because of the small total number of endemic species (Mittermeier, et al. 2004). Similarly, Taiwan shows very high plant endemism richness, but does not meet the minimum criterion of 1,500 strict endemic species.

Table S1. Endemism richness (ER) and data situation for vascular plants by region

| ID   | Region                                       | Area [km <sup>2</sup> ] | ER    | Data quality | References (taxon-based) | References (inventory-based) | TI | TI remarks                                                                                                                                                                                                                                                                                                                                                             |
|------|----------------------------------------------|-------------------------|-------|--------------|--------------------------|------------------------------|----|------------------------------------------------------------------------------------------------------------------------------------------------------------------------------------------------------------------------------------------------------------------------------------------------------------------------------------------------------------------------|
| af01 | Mediterranean regional center of endemism    | 330,000                 | 34.0  | 3            | BISAP (1)                | (2)                          | I  | Not well covered in BISAP data set. Relatively detailed inventory-based data available.                                                                                                                                                                                                                                                                                |
| af02 | Mediterranean/Sahara transition zone         | 473,000                 | 5.7   | 3            | BISAP (1)                | (2)                          | I  | Values from BISAP database are too high because (i) the distribution outside Africa is not covered in BISAP—this is particularly relevant for Saharo-Sindian species that have a large part of their distribution area outside Africa and (ii) the Sahara/Sahel region is heavily overrepresented in BISAP with regard to the number of collection points per species. |
| af03 | Sahara transition zone                       | 7,387,000               | 1.4   | 3            | BISAP (1)                | (2)                          | I  | See af02 above                                                                                                                                                                                                                                                                                                                                                         |
| af04 | Sahel transition zone                        | 2,482,000               | 1.2   | 3            | BISAP (1)                | (2)                          | I  | See af02 above                                                                                                                                                                                                                                                                                                                                                         |
| af05 | Sudanian regional center of endemism         | 3,731,000               | 3.2   | 3            | BISAP (1)                | (2)                          | T  | Comparatively well represented in BISAP data set. Inventory-based data are less reliable because of low degree of strict endemism.                                                                                                                                                                                                                                     |
| af06 | Guinea-Congolia/Sudanian transition zone     | 1,165,000               | 8.7   | 3            | BISAP (1)                | (2)                          | T  | See af05 above                                                                                                                                                                                                                                                                                                                                                         |
| af07 | Guineo-Congolian regional center of endemism | 2,800,000               | 33.4  | 3            | BISAP (1)                | (2)                          | TI | Inventory data probably lead to overestimate because level of strict endemism seems to be lower than estimated by White (1983). Taxon-based data probably lead to underestimate because the Congo basin, which forms the largest portion of the Guineo-Congolian region, is underrepresented in the BISAP data set.                                                    |
| af08 | Guinea-Congolia/Zambezia transition zone     | 705,000                 | 7.9   | 3            | BISAP (1)                | (2)                          | T  | See af06 above                                                                                                                                                                                                                                                                                                                                                         |
| af09 | Zambeziian regional center of endemism       | 3,770,000               | 16.6  | 3            | BISAP (1)                | (2)                          | TI |                                                                                                                                                                                                                                                                                                                                                                        |
| af10 | Kalahari-Highveld transition zone            | 1,223,000               | 13.8  | 3            | BISAP (1)                | (2)                          | TI |                                                                                                                                                                                                                                                                                                                                                                        |
| af11 | Karoo-Namib regional center of endemism      | 661,000                 | 67.0  | 3            | BISAP (1)                | (2)                          | T  | Comparatively well represented in BISAP data set.                                                                                                                                                                                                                                                                                                                      |
| af12 | Cape regional center of endemism             | 90,000                  | 771.4 | 4            | BISAP (1)                | (2)                          | I  | Detailed inventory-based data available.                                                                                                                                                                                                                                                                                                                               |
| af13 | Tongaland-Pondoland regional mosaic          | 148,000                 | 84.6  | 3            | BISAP (1)                | (2)                          | TI |                                                                                                                                                                                                                                                                                                                                                                        |
| af14 | Zanzibar-Inhambane regional mosaic           | 330,000                 | 26.6  | 3            | BISAP (1)                | (2)                          | TI |                                                                                                                                                                                                                                                                                                                                                                        |
| af15 | Somalia-Masai regional center of endemism    | 1,900,000               | 12.0  | 3            | BISAP (1)                | (2)                          | TI |                                                                                                                                                                                                                                                                                                                                                                        |

| ID   | Region                                               | Area [km <sup>2</sup> ] | ER   | Data quality | References (taxon-based) | References (inventory-based) | TI | TI remarks                                                                                                                                                                                                                                                                                                                                                                                                                                                                                                                                             |
|------|------------------------------------------------------|-------------------------|------|--------------|--------------------------|------------------------------|----|--------------------------------------------------------------------------------------------------------------------------------------------------------------------------------------------------------------------------------------------------------------------------------------------------------------------------------------------------------------------------------------------------------------------------------------------------------------------------------------------------------------------------------------------------------|
| af16 | Lake Victoria regional mosaic                        | 224,000                 | 22.8 | 3            | BISAP (1)                | (2)                          | T  | Inventory-based data are less reliable than the taxon-based data because of low degree of strict endemism.                                                                                                                                                                                                                                                                                                                                                                                                                                             |
| af17 | Afromontane regional center of endemism              | 715,000                 | 56.5 | 3            | BISAP (1)                | (2)                          | T  | Inventory-based endemism richness value is presumably underestimated because of the low total species number given by White (1983). The level of endemism richness is very unevenly distributed across the Afromontane RCE with relatively low values per standard area in the Ethiopian part and with higher values in the regions of, e.g., Mt. Cameroon and the Eastern Arc, a difference which could not be resolved in this study for reasons of scale (subregions of the Afromontane RCE are too small to be treated as different regions here). |
| au1  | SW Australian floristic region                       | 310,755                 | 180  | 3            | (3)                      | (4–6)                        | I  | SW portion is heavily underrepresented in the taxon-based data set as stated by Laffan and Crisp (2003)                                                                                                                                                                                                                                                                                                                                                                                                                                                |
| au2  | Arid Australia                                       | 3,753,731               | 6    | 3            | (3)                      | (7), (8)                     | T  | Inventory-based estimate probably too low because of conservative estimate of plant species number by Beadle (1981)                                                                                                                                                                                                                                                                                                                                                                                                                                    |
| au3  | Queensland tropical rain forests                     | 32,113                  | 380  | 3            | (3)                      | (9)                          | TI |                                                                                                                                                                                                                                                                                                                                                                                                                                                                                                                                                        |
| au4  | E and SE Australian temperate forests                | 502,888                 | 60   | 3            | (3)                      | NA                           | T  |                                                                                                                                                                                                                                                                                                                                                                                                                                                                                                                                                        |
| au5  | Tropical shrublands and savannas of Australia        | 2,123,016               | 20   | 3            | (3)                      | NA                           | T  |                                                                                                                                                                                                                                                                                                                                                                                                                                                                                                                                                        |
| au6  | Temperate shrublands and savannas of Australia       | 886,281                 | 10   | 3            | (3)                      | NA                           | T  |                                                                                                                                                                                                                                                                                                                                                                                                                                                                                                                                                        |
| e01  | Arctic region of Eurasia                             | 2,903,340               | 1    | 2            | NA                       | See nca01                    | I  |                                                                                                                                                                                                                                                                                                                                                                                                                                                                                                                                                        |
| e02  | Eurasian boreal region                               | 13,177,000              | 2    | 2            | NA                       | (10)                         | I  |                                                                                                                                                                                                                                                                                                                                                                                                                                                                                                                                                        |
| e03  | European temperate broadleaved forests               | 5,320,289               | 5    | 1            | NA                       | (11, 12)                     | I  |                                                                                                                                                                                                                                                                                                                                                                                                                                                                                                                                                        |
| e04  | Mountains of Central Europe                          | 331,966                 | 50   | 2            | NA                       | (13)                         | I  |                                                                                                                                                                                                                                                                                                                                                                                                                                                                                                                                                        |
| e05  | Northern and Eastern Mediterranean                   | 1,295,427               | 100  | 2            | NA                       | (6), (14–16)                 | I  |                                                                                                                                                                                                                                                                                                                                                                                                                                                                                                                                                        |
| e06  | Caucasus                                             | 532,658                 | 50   | 2            | NA                       | (6)                          | I  |                                                                                                                                                                                                                                                                                                                                                                                                                                                                                                                                                        |
| e07  | Somali-Masai and Afromontane Phytochorion in SW Asia | 530,594                 | 15   | 2            | NA                       | (13)                         | I  |                                                                                                                                                                                                                                                                                                                                                                                                                                                                                                                                                        |
| e08  | Saharo-Sindian Zone in SW Asia                       | 4,372,390               | 2    | 2            | NA                       | (13, 17)                     | I  |                                                                                                                                                                                                                                                                                                                                                                                                                                                                                                                                                        |
| e09  | Irano-Anatolian Region                               | 899,773                 | 40   | 2            | NA                       | (6)                          | I  |                                                                                                                                                                                                                                                                                                                                                                                                                                                                                                                                                        |

| ID  | Region                                                | Area [km <sup>2</sup> ] | ER   | Data quality | References (taxon-based) | References (inventory-based) | TI | TI remarks                                                                                                                                                                                                                                                                                                                                                                                      |
|-----|-------------------------------------------------------|-------------------------|------|--------------|--------------------------|------------------------------|----|-------------------------------------------------------------------------------------------------------------------------------------------------------------------------------------------------------------------------------------------------------------------------------------------------------------------------------------------------------------------------------------------------|
| e10 | Central Irano-Turanian Region                         | 3,792,187               | 8    | 2            | NA                       | (18, 19) (20)                | I  |                                                                                                                                                                                                                                                                                                                                                                                                 |
| e11 | Mountains of Central Asia                             | 863,362                 | 25   | 2            | NA                       | (6)                          | I  |                                                                                                                                                                                                                                                                                                                                                                                                 |
| e12 | Tibetan-Mongolian Grassland and Desert Region         | 6,821,577               | 2    | 1            | NA                       | (21–24)                      | I  |                                                                                                                                                                                                                                                                                                                                                                                                 |
| e13 | Western Ghats                                         | 125,548                 | 190  | 2            | NA                       | (6, 17, 25)                  | I  |                                                                                                                                                                                                                                                                                                                                                                                                 |
| e14 | Core region of India                                  | 2,261,143               | 15   | 1            | NA                       | (17)                         | I  |                                                                                                                                                                                                                                                                                                                                                                                                 |
| e15 | Himalaya                                              | 741,706                 | 60   | 2            | NA                       | (6)                          | I  |                                                                                                                                                                                                                                                                                                                                                                                                 |
| e16 | Mountains of SW China                                 | 262,446                 | 200  | 2            | NA                       | (6)                          | I  |                                                                                                                                                                                                                                                                                                                                                                                                 |
| e17 | Subtropical and temperate forests of Eastern Asia     | 4,138,588               | 12   | 1            | NA                       | (17)                         | I  |                                                                                                                                                                                                                                                                                                                                                                                                 |
| e18 | Indo-Burma                                            | 2,372,996               | 41.5 | 3            | (26)                     | (6)                          | TI |                                                                                                                                                                                                                                                                                                                                                                                                 |
| i01 | Japan                                                 | 373,490                 | 60   | 2            | NA                       | (6, 19)                      | I  |                                                                                                                                                                                                                                                                                                                                                                                                 |
| i02 | Madagascar and Indian Ocean Islands including Socotra | 604,086                 | 203  | 4            | NA                       | (6, 13)                      | I  |                                                                                                                                                                                                                                                                                                                                                                                                 |
| i03 | Sri Lanka                                             | 66,786                  | 190  | 2            | NA                       | (6, 17, 25)                  | I  |                                                                                                                                                                                                                                                                                                                                                                                                 |
| i04 | Taiwan                                                | 35,976                  | 306  | 3            | NA                       | (29)                         | I  |                                                                                                                                                                                                                                                                                                                                                                                                 |
| i05 | Philippines                                           | 297,179                 | 238  | 3            | (26)                     | (6, 19)                      | T  | The uncertainty of the inventory-based estimates is rather high because of contradicting numbers of strict endemics in the literature. The figure 3,510 endemic spp (Groombridge 1992: 80) is a rather conservative estimate whereas other authors give much higher number (6091 spp according to Mittermeier et al. 2004: 33). The taxon-based calculation supports the latter, higher figure. |
| i06 | Sundaland                                             | 1,501,063               | 129  | 3            | (26)                     | (6)                          | TI |                                                                                                                                                                                                                                                                                                                                                                                                 |
| i07 | Wallacea                                              | 338,494                 | 91   | 3            | (26)                     | (6)                          | TI |                                                                                                                                                                                                                                                                                                                                                                                                 |
| i08 | New Guinea                                            | 808,510                 | 176  | 3            | (26)                     | (17)                         | TI |                                                                                                                                                                                                                                                                                                                                                                                                 |
| i09 | East Melanesian Islands                               | 99,384                  | 320  | 3            | (26)                     | (6)                          | I  | The taxon-based data set yields a value that is much lower than the theoretical minimum based on the estimated number of strict endemics alone, so we assume that the sample in the taxon-based data set is not representative for the entire flora here, as we were able to show for New Caledonia.                                                                                            |

| ID    | Region                                   | Area [km <sup>2</sup> ] | ER    | Data quality | References (taxon-based) | References (inventory-based) | TI | TI remarks                                                                                                                                                                                                                                                                                                                                                                                                                                                                                                                                                    |
|-------|------------------------------------------|-------------------------|-------|--------------|--------------------------|------------------------------|----|---------------------------------------------------------------------------------------------------------------------------------------------------------------------------------------------------------------------------------------------------------------------------------------------------------------------------------------------------------------------------------------------------------------------------------------------------------------------------------------------------------------------------------------------------------------|
| i10   | New Caledonia                            | 18,972                  | 1350  | 4            | (26)                     | (6, 27, 28)                  | I  | The taxon-based data set yields a value of endemism richness that is higher than the theoretical maximum based on the very reliable total species number (the theoretical maximum is the figure one would get when assuming that 100% of all species are strict endemics and it is 1,724 range equivalents per 10,000 km <sup>2</sup> for New Caledonia). Given that there are little uncertainties about the total vascular plant species number on New Caledonia, this shows that the taxon-based data set is not representative for the entire flora here. |
| i11   | New Zealand and Tasmania                 | 337,537                 | 74    | 3            | NA                       | (6, 17, 21, 30)              | I  |                                                                                                                                                                                                                                                                                                                                                                                                                                                                                                                                                               |
| i12   | Polynesia-Micronesia and Eastern Pacific | 55,587                  | 680   | 3            | NA                       | (6, 17, 21, 31–34)           | I  |                                                                                                                                                                                                                                                                                                                                                                                                                                                                                                                                                               |
| i13   | Caribbean Islands                        | 234,400                 | 370   | 2            | NA                       | (6), (32)                    | I  |                                                                                                                                                                                                                                                                                                                                                                                                                                                                                                                                                               |
| i14   | Atlantic Islands                         | 18,986                  | 650   | 2            | NA                       | (13, 15, 16, 19, 24, 35)     | I  |                                                                                                                                                                                                                                                                                                                                                                                                                                                                                                                                                               |
| nca01 | Arctic region of North America           | 5,320,712               | 1     | 2            | NA                       | (36–39)                      | I  |                                                                                                                                                                                                                                                                                                                                                                                                                                                                                                                                                               |
| nca02 | Boreal region of North America           | 6,552,574               | 2     | 2            | NA                       | (40)                         | I  |                                                                                                                                                                                                                                                                                                                                                                                                                                                                                                                                                               |
| nca03 | North American Atlantic region           | 5,862,584               | 6     | 1            | (41)                     | NA                           | I  |                                                                                                                                                                                                                                                                                                                                                                                                                                                                                                                                                               |
| nca04 | Rocky Mountain region                    | 2,271,641               | 12    | 2            | (41)                     | (40)                         | I  |                                                                                                                                                                                                                                                                                                                                                                                                                                                                                                                                                               |
| nca05 | Madrean Core region                      | 2,112,592               | 15    | 2            | (41)                     | (40)                         | I  |                                                                                                                                                                                                                                                                                                                                                                                                                                                                                                                                                               |
| nca06 | Californian province                     | 221,648                 | 110   | 2            | NA                       | (40)                         | I  |                                                                                                                                                                                                                                                                                                                                                                                                                                                                                                                                                               |
| nca07 | Madrean Pine-Oak Woodlands               | 460,000                 | 95    | 3            | NA                       | (6)                          | I  |                                                                                                                                                                                                                                                                                                                                                                                                                                                                                                                                                               |
| nca08 | Mesoamerican region                      | 1,008,858               | 100   | 2            | NA                       | (6, 32, 42)                  | I  |                                                                                                                                                                                                                                                                                                                                                                                                                                                                                                                                                               |
| nca09 | Tropical Florida                         | 23,000                  | 150   | 2            | NA                       | (40)                         | I  |                                                                                                                                                                                                                                                                                                                                                                                                                                                                                                                                                               |
| sa01  | West-Ecuador/Choco                       | 148,456                 | 220.9 | 3            | (43)                     | (5, 6, 32)                   | T  | Inventory-based data are available, but were regarded to be a conservative estimate.                                                                                                                                                                                                                                                                                                                                                                                                                                                                          |
| sa02  | Northern Andes including northern Páramo | 337,811                 | 300   | 3            | (43)                     | (44)                         | I  | The (higher) inventory-based value was regarded more reliable than the taxon-based value, which is probably too low because of edge effects (overlap of most grid cells with surrounding regions most of which have considerably lower values of endemism richness).                                                                                                                                                                                                                                                                                          |



| ID   | Region                                       | Area [km <sup>2</sup> ] | ER    | Data quality | References (taxon-based) | References (inventory-based) | TI | TI remarks                                                                                                                                                                                                                                                                                                                                         |
|------|----------------------------------------------|-------------------------|-------|--------------|--------------------------|------------------------------|----|----------------------------------------------------------------------------------------------------------------------------------------------------------------------------------------------------------------------------------------------------------------------------------------------------------------------------------------------------|
| sa03 | Northern Venezuela/Colombia                  | 869,240                 | 33.3  | 3            | (43)                     | (45)                         | TI |                                                                                                                                                                                                                                                                                                                                                    |
| sa04 | Guayanan Highlands                           | 386,432                 | 71.6  | 3            | (43)                     | (45, 46)                     | T  | Taxon-based data were regarded as more reliable because the (lower) inventory-based endemism richness figure based on Gentry (1992) appears to be too low when comparing the total species number given by Gentry (1992) with the figure given by Berry et al. (1995) who estimate 9,500–10,300 spp for the Venezuelan part of the Guayana Shield. |
| sa05 | Peruvian/Bolivian Yungas and montane forests | 231,429                 | 210.4 | 2            | (43, 47)                 | (18)                         | T  | The figure derived from the data set by Nowicki (2004) was deemed more reliable, inter alia because of its higher spatial resolution compared to the data set of Morawetz and Raedig. Inventory-based data were only available for the total species number.                                                                                       |
| sa06 | Southwest Amazon                             | 1,026,366               | 58.2  | 2            | (43, 47)                 | (18)                         | T  | The Morawetz and Raedig data are more representative for the entire region than the Nowicki data, which only cover the smaller Bolivian part. Inventory-based data were only available for the total species number.                                                                                                                               |
| sa07 | Tucumanian-Bolivian Forest                   | 55,337                  | 70.0  | 2            | (43, 47)                 | NA                           | T  | The Morawetz and Raedig data are more representative for the entire region than the Nowicki data, which only cover the smaller Bolivian part.                                                                                                                                                                                                      |
| sa08 | Guyanas                                      | 673,699                 | 60    | 3            | (43)                     | (18, 45)                     | TI | We gave more weight to the inventory-based data (70%) than to the taxon-based data (30%) because the latter are presumably influenced by above-average collection density. However, inventory-based data were not deemed reliable enough to solely base the estimate on them.                                                                      |
| sa09 | Northwest Amazon                             | 459,693                 | 68.1  | 3            | (43)                     | (18, 31, 44)                 | T  | Inventory data were deemed somewhat less reliable than the taxon-based data.                                                                                                                                                                                                                                                                       |

| ID   | Region                                                                   | Area [km <sup>2</sup> ] | ER   | Data quality | References (taxon-based) | References (inventory-based) | TI | TI remarks                                                                                                                                                                                                                                           |
|------|--------------------------------------------------------------------------|-------------------------|------|--------------|--------------------------|------------------------------|----|------------------------------------------------------------------------------------------------------------------------------------------------------------------------------------------------------------------------------------------------------|
| sa10 | Moxos-Pantanal flooded savannas                                          | 297,120                 | 13   | 2            | (43, 47)                 | (18)                         | T  | Region probably underrepresented in Morawetz and Raedig data (relatively large portion of grid cells with no collections at all). Thus Nowicki data seem to be more reliable. Inventory-based data were only available for the total species number. |
| sa11 | Cerrado                                                                  | 1,916,882               | 26.2 | 3            | (43)                     | (6)                          | TI |                                                                                                                                                                                                                                                      |
| sa12 | Southern Andean-Patagonian steppe                                        | 716,792                 | 10   | 2            | NA                       | (32)                         | I  |                                                                                                                                                                                                                                                      |
| sa13 | Humid Argentinian-Uruguayan savannas                                     | 712,969                 | 12   | 1            | NA                       | (32)                         | I  |                                                                                                                                                                                                                                                      |
| sa14 | Chaco                                                                    | 634,314                 | 10.2 | 2            | (47)                     | (18)                         | T  | Inventory-based data were only available for the total species number.                                                                                                                                                                               |
| sa15 | Humid Chaco and moist forests of Southern Brazil                         | 1,034,655               | 20   | 2            | (43)                     | (48)                         | I  | Result from taxon-based calculation was somewhat lower, presumably because of low collection density.                                                                                                                                                |
| sa16 | South American Atlantic Coastal Forests                                  | 246,812                 | 300  | 3            | (43)                     | (32, 49) (6)                 | I  | Edge effects affect the taxon-based data, making them an underestimate.                                                                                                                                                                              |
| sa17 | Caatinga s.l.                                                            | 1,285,700               | 24.6 | 2            | (43)                     | (18)                         | T  | Inventory-based data were only available for the total species number.                                                                                                                                                                               |
| sa18 | Southern Amazonian dry forests                                           | 645,975                 | 17.8 | 2            | (43), (47)               | (18)                         | T  | Region probably underrepresented in Morawetz and Raedig data (relatively large portion of grid cells with no collections at all). Thus Nowicki data seem to be more reliable. Inventory-based data were only available for the total species number. |
| sa19 | Amazonia                                                                 | 3,480,272               | 46.4 | 2            | (43)                     | NA                           | T  |                                                                                                                                                                                                                                                      |
| sa20 | South American Pacific coastal dry forests                               | 70,726                  | 52.4 | 2            | (43)                     | (18)                         | T  | Inventory-based data were only available for the total species number.                                                                                                                                                                               |
| sa21 | Inter-Andean forests, southern Paramo, and Puna                          | 385,699                 | 25   | 2            | (43, 47)                 | (18)                         | TI |                                                                                                                                                                                                                                                      |
| sa22 | South American Pacific coastal deserts, montane Atacama, and desert Puna | 599,549                 | 10   | 2            | (43, 47)                 | (18, 32)                     | TI |                                                                                                                                                                                                                                                      |
| sa23 | Chilean matorral                                                         | 148,509                 | 95   | 2            | NA                       | (6, 32)                      | I  |                                                                                                                                                                                                                                                      |
| sa24 | Valdivian temperate forests                                              | 248,088                 | 20   | 2            | NA                       | (32, 50)                     | I  |                                                                                                                                                                                                                                                      |
| sa25 | Magellanic subpolar forests                                              | 164,636                 | 10   | 1            | NA                       | (32)                         | I  |                                                                                                                                                                                                                                                      |
| sa26 | Monte and dry Pampas                                                     | 1,000,553               | 5    | 1            | NA                       | (18, 32, 51)                 | I  |                                                                                                                                                                                                                                                      |

ID: Unique identifier for each region, beginning with an area code. af, Africa; au, Australia; e, Eurasia; I, Oceanic Islands; nca, Northern and Central America; sa, South America.

ER: Endemism richness [range equivalents per 10,000 km<sup>2</sup>].

Data quality (suitability and quality of underlying data): 1, very poor; 2, poor; 3, good; 4, very good. The assessment of data situation is a subjective estimate

based on the following criteria: Were both taxon-based and inventory-based data available, or only one type of data? How large was the sample of taxon-based data and how was its representativity judged in the region, taking into account both taxonomic representativity and spatial differences in collecting intensity? How detailed was chorological information available for inventory-based data and how large is the percentage of strict endemics? How reliable were the underlying data estimated to be? How well did the geographic boundaries of the region match with the boundaries of the regions or grid cells for which data were available?

TI: T, only taxon-based data were used for the assessment of endemism richness; I, only inventory-based data were used; TI, both types of data were used and both types of data were given equal weight unless a different weighting is stated in the column "TI remarks."

TI remarks: When both types of data were available, explanations are given if 1 type of data was not used or weighted differently.

1. Küper W, Sommer JH, Lovett JC, Barthlott W (2006) Deficiency in African plant distribution data: Missing pieces of the puzzle. *Bot J Linn Soc* 150(3):355–368.
2. Kier G, Barthlott W (2001) Measuring and mapping endemism and species richness: A new methodological approach and its application on the flora of Africa. *Biodivers Conserv* 10:1513–1529.
3. Laffan SW, Crisp MD (2003) Assessing endemism at multiple spatial scales, with an example from the Australian vascular flora. *J Biogeogr* 30:511–520.
4. Hopper SD, Gioia P (2004) The Southwest Australian Floristic Region: Evolution and conservation of a global hot spot of biodiversity. *Annu Rev Ecol Evol Syst* 35:623–650.
5. Myers N, Mittermeier RA, Mittermeier CG, da Fonseca GAB, Kent J (2000) Biodiversity hotspots for conservation priorities. *Nature* 403:853–858.
6. Mittermeier RA, et al. (2004) *Hotspots Revisited. Earth's Biologically Richest and Most Endangered Terrestrial Ecoregions* (CEMEX, New Mexico).
7. Beadle NCW (1981) *The Vegetation of Australia* (Fischer, Stuttgart), p 690.
8. Beard JS, Chapman AR, Gioia P (2000) Species richness and endemism in the western Australian flora. *J Biogeogr* 27:1257–1268.
9. Goosem S (2001) Queensland tropical rain forests.
10. Malyshev LI, Balkov KS, Doronkin VM (1999) Spatial diversity in the Siberian flora. *Flora* 194:357–368.
11. Tutin TG, et al. (1993) *Flora Europaea* (Cambridge Univ Press, Cambridge, UK) 2nd Ed, p 581.
12. Tutin TG, et al. (1964–1980) *Flora Europaea* (Cambridge Univ Press, Cambridge).
13. Davis SD, Heywood VH, Hamilton AC, eds (1994) *Centres of Plant Diversity. A Guide and Strategy for Their Conservation, Vol 1: Europe, Africa and the Middle East*. (IUCN Publications Unit, Cambridge, UK).
14. White F (1983) *The Vegetation of Africa: A Descriptive Memoir to Accompany the UNESCO/AETFAT/UNSO Vegetation Map of Africa* (UNESCO, Paris), p 356.
15. Kämmer F (1982) *Beiträge zu einer kritischen Interpretation der rezenten und fossilen Gefäßpflanzenflora und Wirbeltierfauna der Azoren, des Madeira-Archipels, der Ilhas Selvagens, der Kanarischen Inseln und der Kapverdischen Inseln, mit einem Ausblick auf Probleme des Artenschwundes in Makaronesien* (Eigenverlag).
16. Hansen A, Sunding P (1993) *Flora of Macaronesia. Checklist of Vascular Plants*, p 295.
17. Davis SD, Heywood VH, Hamilton AC, eds (1995) *Centres of Plant Diversity. A Guide and Strategy for Their Conservation, Vol 2: Asia, Australia and the Pacific*. (IUCN Publications Unit, Cambridge, UK).
18. Kier G, et al. (2005) Global patterns of plant diversity and floristic knowledge. *J Biogeogr* 32(7):1107–1116.
19. Groombridge B, ed (1992) *Global Biodiversity. Status of the Earth's Living Resources* (Chapman & Hall, London).
20. Walter H, Breckle S-W (1986) *Ökologie der Erde, Band 3: Spezielle Ökologie der gemäßigten und arktischen Zonen Euro-Nordasiens* (Fischer, Stuttgart) pp X, 587.
21. Frodin DG (2001) *Guide to Standard Floras of the World* (Cambridge Univ Press, Cambridge, UK) 2nd Ed, pp XXIV, 1100.
22. Wu SG, Yang YP, Fei Y (1995) On the flora of the alpine region in the Qinghai-Xizang (Tibet) Plateau. *Acta Botanica Yunnanica* 17(3):233–250.
23. Malyshev LI (1994) *Floristic Richness of the UDSSR* (Nauka, St. Petersburg), pp 34–87.
24. Davis SD, et al. (1986) *Plants in Danger* [International Union for Conservation of Nature and Natural Resources (IUCN), Gland, Switzerland], p 461.
25. Myers N (1990) The biodiversity challenge: Expanded hot-spots analysis. *Environmentalist* 10:243–256.
26. Krupnick GA, Kress WJ (2003) Hotspots and ecoregions: A test of conservation priorities using taxonomic data. *Biodivers Conserv* 12:2237–2253.
27. Morat P, Veillon J-M, Mackee HS (1986) Floristic relationship of New Caledonian rain forest phanerogams. *Telopea* 2(6):631–679.
28. Lowry II PP (1996) Diversity, endemism, and extinction in the flora of New Caledonia: A review, in *Rare, Threatened, and Endangered Floras of the Pacific Rim. Proceedings of the International Symposium "Rare, Threatened, and Endangered Floras of Asia and the Pacific Rim," held at the Inst. of Botany, Academia Sinica, Taipei, Taiwan, 30 April–4 May*, eds Peng C-I, Lowry, II PP. Available at <http://cissus.mobot.org/MOBOT/research/newcaledonia>.
29. Hsieh CF (2003) Composition, endemism and phytogeographical affinities of the Taiwan flora. *Flora of Taiwan*, ed Editorial Committee of the Flora of Taiwan (Department of Botany, National Taiwan University, Taipei).
30. Wilton AD, Breitwieser I (2000) Composition of the New Zealand seed plant flora. *New Zealand J Bot* 38:537–549.
31. Jørgensen PM, León-Yáñez S (1999) *Catalogue of the Vascular Plants of Ecuador* (Missouri Botanical Garden Press, St. Louis) pp viii, 1181.
32. Davis SD, Heywood VH, Herrera-MacBryde O, Villa-Lobos JL, Hamilton AC, eds (1997) *Centres of Plant Diversity. A Guide and Strategy for Their Conservation, Vol 3: The Americas*. (IUCN Publications Unit, Cambridge, UK).
33. Trusty JL, Kesler HC, Delgado GH (2006) Vascular Flora of Isla del Coco, Costa Rica. *Proceedings of the California Academy of Sciences* 57:247–355.
34. Marticorena C (1990) Contribución a la estadística de la flora vascular de Chile. *Gayana Botanica* 47(3/4):85–113.
35. Brenan JPM (1978) Some aspects of the phytogeography of tropical Africa. *Ann Mo Bot Gard* 65(2):437–478.
36. Polunin N (1959) *Circumpolar Arctic Flora* (Clarendon Press, Oxford, UK).
37. Hultén E (1968) *Flora of Alaska and neighbouring Territories*. (Stanford Univ. Press, Stanford, CA).
38. Böcher TW, Holmen K, Jakobson K (1968) *The Flora of Greenland* (P. Haase & Son, Copenhagen).
39. Polunin N (1940) Botany of the Canadian eastern Arctic Part 1.: Pteridophyta and Spermatophyta. *Botany of the Canadian eastern Arctic Part 1.: Pteridophyta and Spermatophyta* 92:1–408.
40. Thorne RF (1993) Phytogeography. *Flora of North America North of Mexico, Vol 1*, ed Flora of North American Committee (Oxford Univ Press, Oxford, UK), Vol 1, pp 132–153.
41. USDA, NRCS (1997) The PLANTS database. (National Plant Data Center, Baton Rouge, LA).
42. Sosa V, Dávila P (1994) Una evaluación del conocimiento florístico de México. *Ann Mo Bot Gard* 81(4):749–757.
43. Morawetz W, Raedig C (2007) Angiosperm biodiversity, endemism and conservation in the Neotropics. *Taxon* 56(4):1245–1239E.
44. Valencia R, Pitman N, León-Yáñez S, Jørgensen PM (2000) *Libro Rojo de las Plantas Endémicas del Ecuador* (Herbario QCA, Pontificia Universidad Católica del Ecuador, Quito).
45. Gentry AH (1992) Tropical forest biodiversity: Distributional patterns and their conservational significance. *Oikos* 63(1):19–28.
46. Berry PE, Huber O, Holst BK (1995) Floristic analysis and phytogeography. *Flora of the Venezuelan Guayana, Vol 1: Introduction*, eds Berry PE, Holst BK, Yatskievych K (Timber Press, Portland, OR), pp 161–191.
47. Nowicki C (2004) *Naturschutz in Raum und Zeit. Biodiversitätsextrapolationen, Klimaszenarien und soziodemographische Analysen als Instrumente der Naturschutzplanung am Beispiel Boliviens* (GTZ, Eschborn, Germany).
48. Frodin DG (1984) *Guide to Standard Floras of the World* (Cambridge Univ Press, Cambridge, UK) pp XX, 619.
49. Myers N (1988) Threatened biotas: "Hot spots" in tropical forests. *Environmentalist* 8(3):187–208.
50. Smith C (2001) Valdivian temperate forests.
51. Zuloaga F, Morrone O, Rodríguez D (1999) Análisis de la biodiversidad en plantas vasculares de la Argentina. *Kurtzia* 27(1):17–167.

**Table S2. Summary information on the number of range equivalents (RE) for vascular plants and terrestrial vertebrates in mainland and island regions**

|                         | Total RE | Islands |      |                                    | Mainlands |      |                                    |
|-------------------------|----------|---------|------|------------------------------------|-----------|------|------------------------------------|
|                         |          | RE      | %    | RE/10 <sup>4</sup> km <sup>2</sup> | RE        | %    | RE/10 <sup>4</sup> km <sup>2</sup> |
| Vascular plants         | 315,903  | 82,546  | 26.1 | 172.3                              | 233,357   | 73.9 | 18.2                               |
| Amphibians              | 4,792    | 986     | 20.6 | 2.1                                | 3,806     | 79.4 | 0.3                                |
| Reptiles                | 7,506    | 1,952   | 26.0 | 4.1                                | 5,553     | 74.0 | 0.4                                |
| Birds                   | 9,585    | 2,227   | 23.2 | 4.7                                | 7,358     | 76.8 | 0.6                                |
| Mammals                 | 4,703    | 1,013   | 21.5 | 2.1                                | 3,690     | 78.5 | 0.3                                |
| Terrestrial vertebrates | 26,586   | 6,178   | 23.2 | 12.9                               | 20,407    | 76.8 | 1.6                                |

Table S3. Endemism richness (ER) for terrestrial vertebrates by region (range equivalents per 10,000 km<sup>2</sup>)

| ID    | Region                                               | Amphibians | Reptiles | Birds | Mammals | Terrestrial vertebrates |
|-------|------------------------------------------------------|------------|----------|-------|---------|-------------------------|
| af01  | Mediterranean RCE                                    | 0.01       | 0.59     | 0.16  | 0.23    | 1.00                    |
| af02  | Mediterranean/Sahara RTZ                             | 0.02       | 0.34     | 0.23  | 0.27    | 0.85                    |
| af03  | Sahara RTZ                                           | 0.01       | 0.07     | 0.09  | 0.07    | 0.23                    |
| af04  | Sahel RTZ                                            | 0.02       | 0.14     | 0.36  | 0.18    | 0.70                    |
| af05  | Sudanian RCE                                         | 0.07       | 0.23     | 0.49  | 0.26    | 1.04                    |
| af06  | Guinea-Congolia/Sudania RTZ                          | 0.47       | 0.49     | 0.86  | 0.62    | 2.43                    |
| af07  | Guineo-Congolian RCE                                 | 0.65       | 0.52     | 1.02  | 0.77    | 2.96                    |
| af08  | Guinea-Congolia/Zambezia RTZ                         | 0.22       | 0.48     | 0.99  | 0.44    | 2.13                    |
| af09  | Zambezi RCE                                          | 0.26       | 0.62     | 0.85  | 0.38    | 2.11                    |
| af10  | Kalahari/Highveld RTZ                                | 0.15       | 0.68     | 0.69  | 0.35    | 1.86                    |
| af11  | Karoo-Namib RCE                                      | 0.21       | 1.58     | 0.78  | 0.51    | 3.08                    |
| af12  | Cape RCE                                             | 1.95       | 2.89     | 1.42  | 0.96    | 7.22                    |
| af13  | Tongaland-Pondoland                                  | 0.96       | 2.35     | 1.09  | 0.64    | 5.04                    |
| af14  | Zanzibar-Inhambane RM                                | 0.71       | 2.40     | 1.82  | 0.83    | 5.77                    |
| af15  | Somali-Masai RCE                                     | 0.12       | 0.72     | 1.00  | 0.51    | 2.35                    |
| af16  | Lake Victoria RM                                     | 0.52       | 0.64     | 1.66  | 1.03    | 3.85                    |
| af17  | Afromontane RCE                                      | 1.55       | 1.40     | 2.44  | 1.53    | 6.91                    |
| au1   | SW Australian Floristic Region                       | 0.68       | 1.87     | 0.78  | 0.56    | 3.89                    |
| au2   | Arid Australia                                       | 0.06       | 0.64     | 0.32  | 0.16    | 1.19                    |
| au3   | Queensland tropical rain forests                     | 7.80       | 10.03    | 2.50  | 1.24    | 21.57                   |
| au4   | E and SE Australian temperate forests                | 0.97       | 1.77     | 1.34  | 0.62    | 4.71                    |
| au5   | Tropical shrublands and savannas of Australia        | 0.31       | 1.32     | 0.81  | 0.53    | 2.97                    |
| au6   | Temperate shrublands and savannas of Australia       | 0.15       | 0.58     | 0.66  | 0.21    | 1.60                    |
| e01   | Arctic region of Eurasia                             | 0.00       | 0.00     | 0.07  | 0.02    | 0.10                    |
| e02   | Eurasian boreal region                               | 0.01       | 0.01     | 0.12  | 0.06    | 0.18                    |
| e03   | European temperate broadleaved forests               | 0.04       | 0.06     | 0.11  | 0.13    | 0.35                    |
| e04   | Mountains of Central Europe                          | 0.16       | 0.12     | 0.10  | 0.14    | 0.51                    |
| e05   | Northern and Eastern Mediterranean                   | 0.27       | 0.45     | 0.17  | 0.24    | 1.13                    |
| e06   | Caucasus                                             | 0.06       | 0.38     | 0.15  | 0.32    | 0.90                    |
| e07   | Somali-Masai and Afromontane Phytochorion in SW Asia | 0.08       | 0.78     | 0.37  | 0.30    | 1.52                    |
| e08   | Saharo-Sindian Zone in SW Asia                       | 0.02       | 0.34     | 0.22  | 0.15    | 0.72                    |
| e09   | Irano-Anatolian region                               | 0.11       | 0.51     | 0.15  | 0.21    | 0.98                    |
| e10   | Central Irano-Turanian region                        | 0.02       | 0.18     | 0.11  | 0.14    | 0.44                    |
| e11   | Mountains of Central Asia                            | 0.04       | 0.10     | 0.25  | 0.19    | 0.58                    |
| e12   | Tibetan-Mongolian grassland and desert region        | 0.04       | 0.08     | 0.30  | 0.18    | 0.60                    |
| e13   | Western Ghats                                        | 7.07       | 7.54     | 1.82  | 0.96    | 17.39                   |
| e14   | Core region of India                                 | 0.10       | 0.40     | 0.50  | 0.35    | 1.34                    |
| e15   | Himalaya                                             | 0.83       | 0.94     | 1.06  | 0.49    | 3.32                    |
| e16   | Mountains of SW China                                | 0.81       | 0.33     | 1.00  | 0.76    | 2.91                    |
| e17   | Subtropical and temperate forests of Eastern Asia    | 0.32       | 0.32     | 0.54  | 0.24    | 1.43                    |
| e18   | Indo-Burma                                           | 0.74       | 1.24     | 1.48  | 0.79    | 4.25                    |
| i01   | Japan                                                | 1.22       | 0.89     | 0.43  | 1.34    | 3.89                    |
| i02   | Madagascar and Indian Ocean Islands incl. Socotra    | 2.40       | 6.38     | 3.12  | 2.24    | 14.13                   |
| i03   | Sri Lanka                                            | 5.29       | 13.68    | 3.78  | 2.28    | 25.02                   |
| i04   | Taiwan                                               | 5.26       | 6.34     | 4.11  | 3.50    | 19.20                   |
| i05   | Philippines                                          | 2.59       | 5.95     | 6.97  | 3.40    | 18.90                   |
| i06   | Sundaland                                            | 1.37       | 2.34     | 2.40  | 1.75    | 7.86                    |
| i07   | Wallacea                                             | 1.09       | 3.54     | 8.60  | 4.10    | 17.33                   |
| i08   | New Guinea                                           | 2.80       | 2.44     | 5.06  | 2.19    | 12.48                   |
| i09   | East Melanesian Islands                              | 3.90       | 6.39     | 16.63 | 4.50    | 31.43                   |
| i10   | New Caledonia                                        | 0.00       | 32.12    | 13.62 | 3.26    | 49.00                   |
| i11   | New Zealand and Tasmania                             | 0.20       | 1.31     | 2.61  | 0.26    | 4.37                    |
| i12   | Polynesia-Micronesia and Eastern Pacific             | 0.54       | 9.33     | 36.55 | 2.40    | 48.82                   |
| i13   | Caribbean Islands                                    | 5.82       | 13.52    | 7.53  | 1.72    | 28.59                   |
| i14   | Atlantic Islands                                     | 5.82       | 19.31    | 29.70 | 3.74    | 58.57                   |
| nca01 | Arctic region of North America                       | 0.00       | 0.00     | 0.03  | 0.02    | 0.04                    |
| nca02 | Boreal region of North America                       | 0.01       | 0.00     | 0.09  | 0.05    | 0.15                    |
| nca03 | North American Atlantic region                       | 0.22       | 0.20     | 0.25  | 0.15    | 0.82                    |
| nca04 | Rocky Mountain region                                | 0.14       | 0.05     | 0.21  | 0.32    | 0.72                    |
| nca05 | Madrean Core region                                  | 0.15       | 0.82     | 0.56  | 0.58    | 2.11                    |
| nca06 | Californian province                                 | 0.45       | 0.50     | 0.65  | 0.93    | 2.53                    |
| nca07 | Madrean Pine-Oak Woodlands                           | 1.88       | 3.72     | 2.61  | 1.97    | 10.19                   |
| nca08 | Mesoamerican Region                                  | 2.98       | 3.96     | 3.52  | 1.54    | 12.00                   |



**Table S4. Main biogeographical classifications used for the delineation of endemism regions**

| Continent       | Underlying biogeographical classification            |
|-----------------|------------------------------------------------------|
| Africa          | UNESCO/AETFAT/UNSO vegetation map (1)                |
| Australia       | Biomes and ecoregions (2)                            |
| North America   | Flora of North America (3)                           |
| Central America | Biodiversity hotspots (4)                            |
| South America   | Biomes and ecoregions (2)                            |
| Eurasia         | Biomes and ecoregions (2), biodiversity hotspots (4) |
| Islands         | Biodiversity hotspots (4)                            |

See *Methods* for information on the 3 further criteria that guided the delineation.

1. White F (1983) *The Vegetation of Africa: A Descriptive Memoir to Accompany the UNESCO/AETFAT/UNSO Vegetation Map of Africa* (UNESCO, Paris), p 356.
2. Olson DM, et al. (2001) Terrestrial ecoregions of the world: A new map of life on earth. *BioScience* 51:933–938.
3. Thorne RF (1993) *Phytogeography. Flora of North America North of Mexico, Vol 1*, ed Flora of North American Committee (Oxford Univ Press, Oxford, UK), Vol 1, pp 132–153.
4. Mittermeier RA, et al. (2004) *Hotspots Revisited. Earth's Biologically Richest and Most Endangered Terrestrial Ecoregions* (CEMEX, New Mexico).
